# Supplementary material for: Combination of Tumor Site–Located CTL-Associated Antigen-4 Blockade and Systemic Regulatory T-Cell Depletion Induces Tumor-Destructive Immune Responses
Source: Oxford University Press journal article supplement (doi:10.1158/0008-5472.can-06-4296), 2007-06-15
Supplement: 00085472can064296-sup-supplementary_tab2.pdf [file 00085472can064296-sup-supplementary_tab2.pdf]

## Supplementary Table 2

| tissue | patient # | FoxP3 <sup>+</sup> /mm <sup>2</sup> | CD8 <sup>+</sup> /mm <sup>2</sup> | FoxP3/CD8 |
|--------|-----------|-------------------------------------|-----------------------------------|-----------|
| normal | 1         | 6.2                                 | 27.2                              | 0.2       |
|        | 2         | 0.3                                 | 0                                 | -         |
|        | 3         | 1.1                                 | 10.9                              | 0.1       |
|        | 4         | 5                                   | 22                                | 0.2       |
| CIN1   | 5         | 74.6                                | 53.1                              | 1.4       |
|        | 6         | 24.2                                | 10.5                              | 2.3       |
|        | 7         | 1.5                                 | 0.8                               | 1.8       |
|        | 8         | 12.7                                | 148                               | 0.1       |
|        | 9         | 0.2                                 | 27.6                              | 0.01      |
|        | 10        | 1.3                                 | 114                               | 0.01      |
| CIN2   | 11        | 6.3                                 | 6.8                               | 0.9       |
|        | 12        | 46                                  | 36.2                              | 1.3       |
|        | 13        | 13.3                                | 114.6                             | 0.1       |
|        | 14        | 41.3                                | 133                               | 0.3       |
|        | 15        | n.d.                                | 95.5                              | -         |
|        | 16        | 67                                  | 315                               | 0.2       |
| CIS    | 17        | 120.6                               | n.d.                              | -         |
|        | 18        | 75.4                                | 10.9                              | 6.9       |
|        | 19        | 31                                  | 133.3                             | 0.2       |
|        | 20        | n.d.                                | 33.6                              | -         |
|        | 21        | 29                                  | 77                                | 0.4       |
| SCC    | 22        | 19.7                                | n.d.                              | -         |
|        | 23        | 13.4                                | 0.3                               | 40.1      |
|        | 24        | 4.2                                 | 0.7                               | 6.2       |
|        | 25        | 78.6                                | 41.7                              | 1.9       |
|        | 26        | 26.5                                | 11.4                              | 2.3       |

Quantification of FoxP3<sup>+</sup> and CD8<sup>+</sup> cells in normal, pre-cancerous and cancerous cervix tissues (positive cells/mm<sup>2</sup>). 4 normal, 6 CIN1, 6 CIN2, 5 CIS and 5 invasive SCC tissue samples were obtained from individual patients and stained for FoxP3<sup>+</sup> and CD8<sup>+</sup> expression as described in *Material and Methods*. The right column indicates the FoxP3/CD8 ratio of the individual tissues. *n.d.*, not determined.
